# Supplementary material for: Snacking on Almonds Lowers Glycaemia and Energy Intake Compared to a Popular High-Carbohydrate Snack Food: An Acute Randomised Crossover Study
Source: MDPI journal article supplement (doi:10.3390/ijerph182010989), 2021-10-19
Supplement: s1 [file s1]

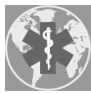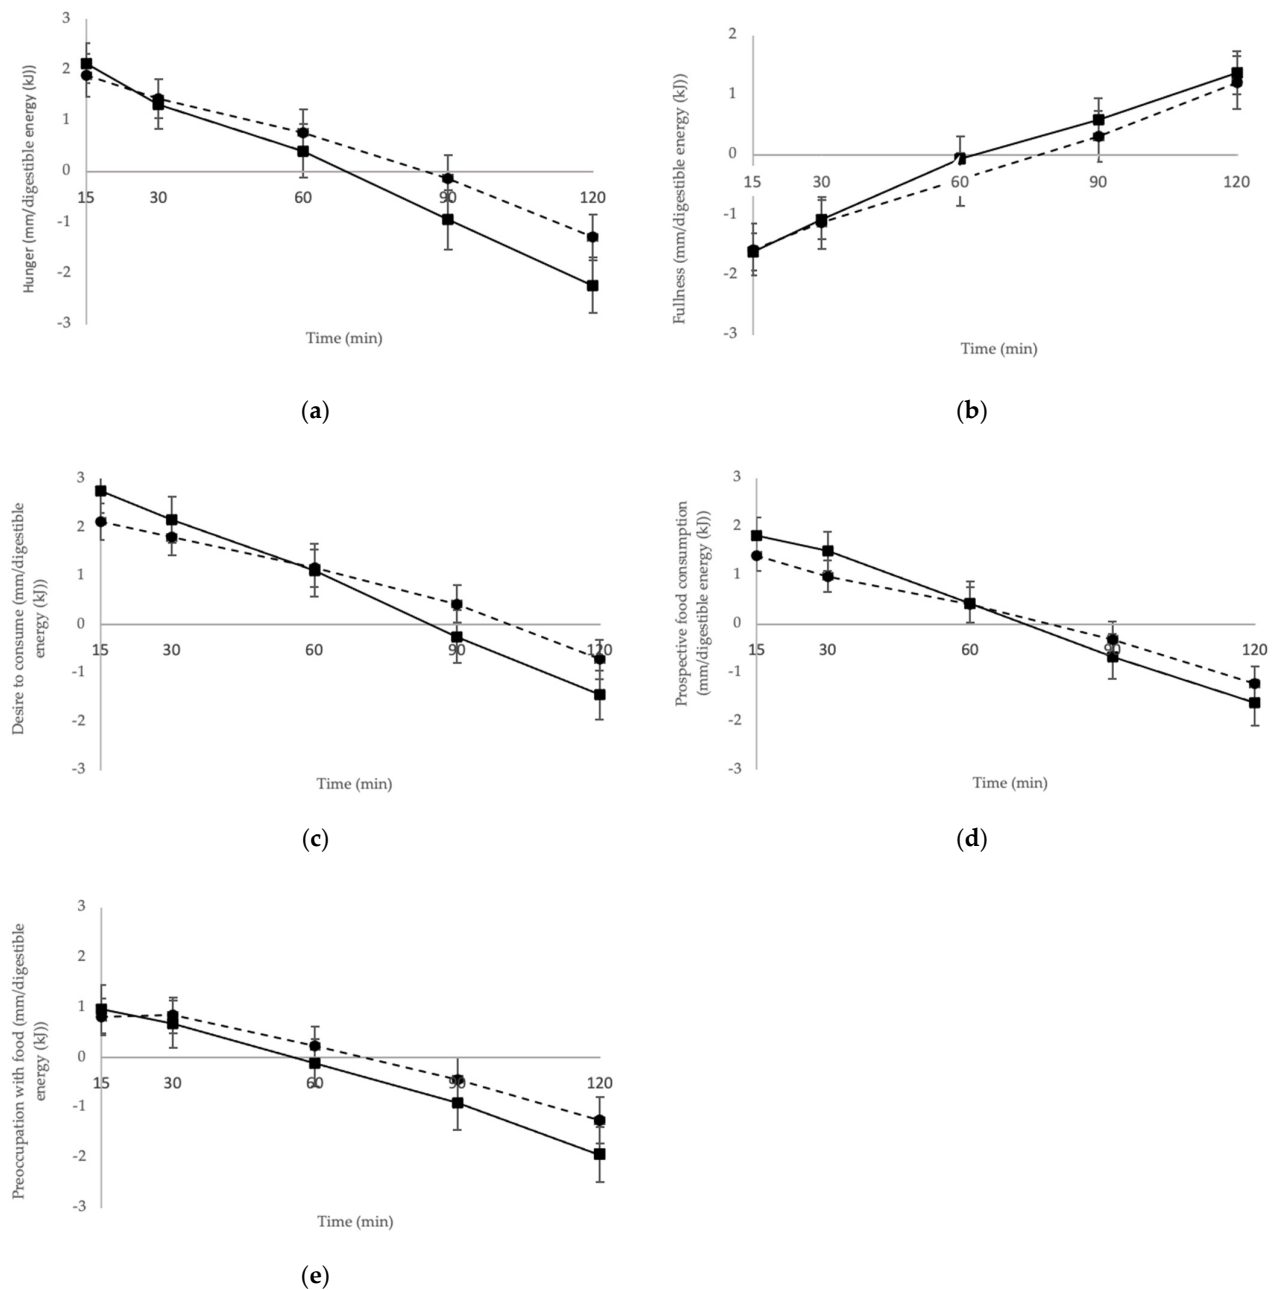

**Figure S1.** Satiety quotient (using digestible energy) immediately after consuming the snack to 120 minutes for: (a) Hunger; (b) Fullness; (c) Desire to consume; (d) Prospective food consumption; (e) Preoccupation with food. Solid line with ■, almonds; dashed line with ●, biscuits
